# Supplementary material for: Computational studies on functionalized Janus MXenes MM′CT2, (M, M′ = Zr, Ti, Hf, M ≠ M′; T = –O, –F, –OH): photoelectronic properties and potential photocatalytic activities
Source: Royal Society of Chemistry journal article supplement (doi:10.1039/d3ra00303e), 2023-01-01
Supplement: d3ra00303e1.pdf [file d3ra00303e1.pdf]

**Electronic Supplementary Information (ESI)**

**Computational Studies on Functionalized Janus MXenes  
MM'CT<sub>2</sub>, (M, M'=Zr, Ti, Hf, M ≠ M'; T = -O, -F, -OH):  
Photoelectronic Properties and Potential Photocatalytic  
Activities**

**Kuangwei Xiong,<sup>\*,a</sup> Ziqiang Cheng,<sup>a</sup> Jianpeng Liu,<sup>a</sup> Peng-Fei Liu,<sup>b</sup> Zhenfa Zi<sup>c</sup>**

<sup>a</sup>Department of Physics, East China Jiaotong University, Nanchang 330013, P.R. China

<sup>b</sup>*Institute of High Energy Physics, Chinese Academy of Sciences, Beijing 100049, P.R. China*

<sup>c</sup>School of Physics and Materials Engineering, Hefei Normal University, Hefei 230601, P.R. China

\* E-mail: [xiongkw@ecjtu.edu.cn](mailto:xiongkw@ecjtu.edu.cn);

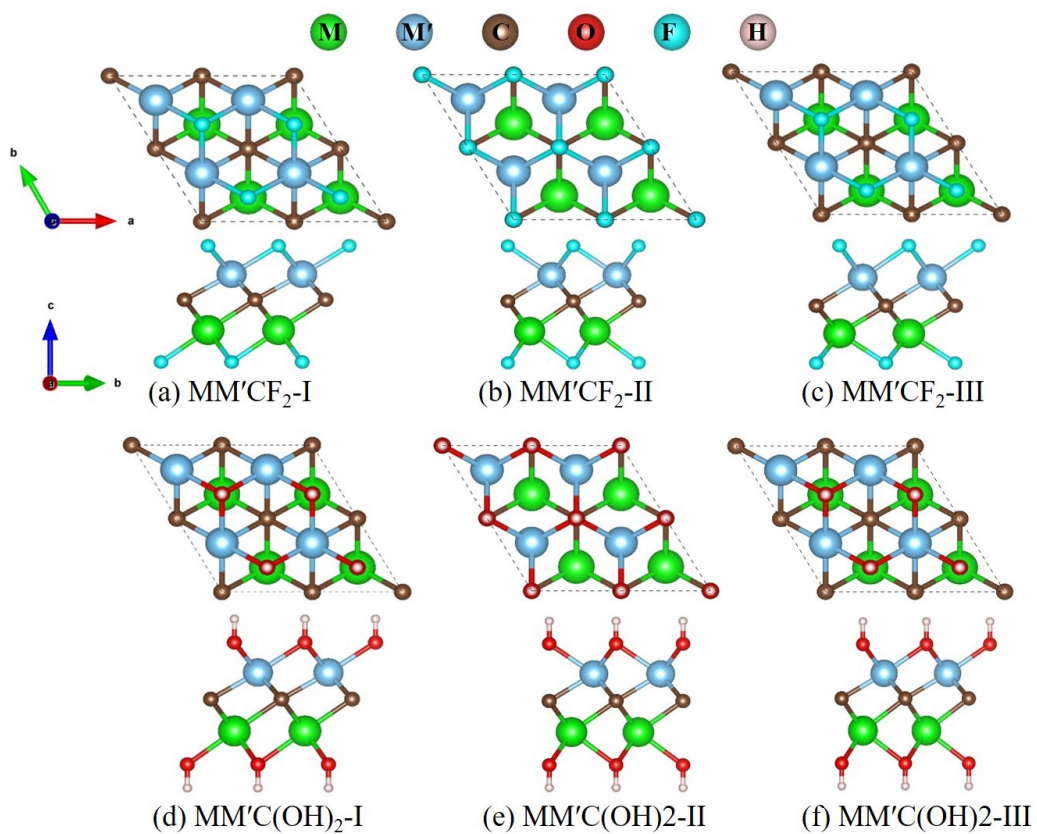

**Fig. S1** Top view (top) and side view (bottom) of geometries of (a–c)  $MM'CF_2$ -I, II, III; (d–f)  $MM'C(OH)_2$ -I, II, III. M, M' = Zr, Ti, Hf;  $M \neq M'$ .

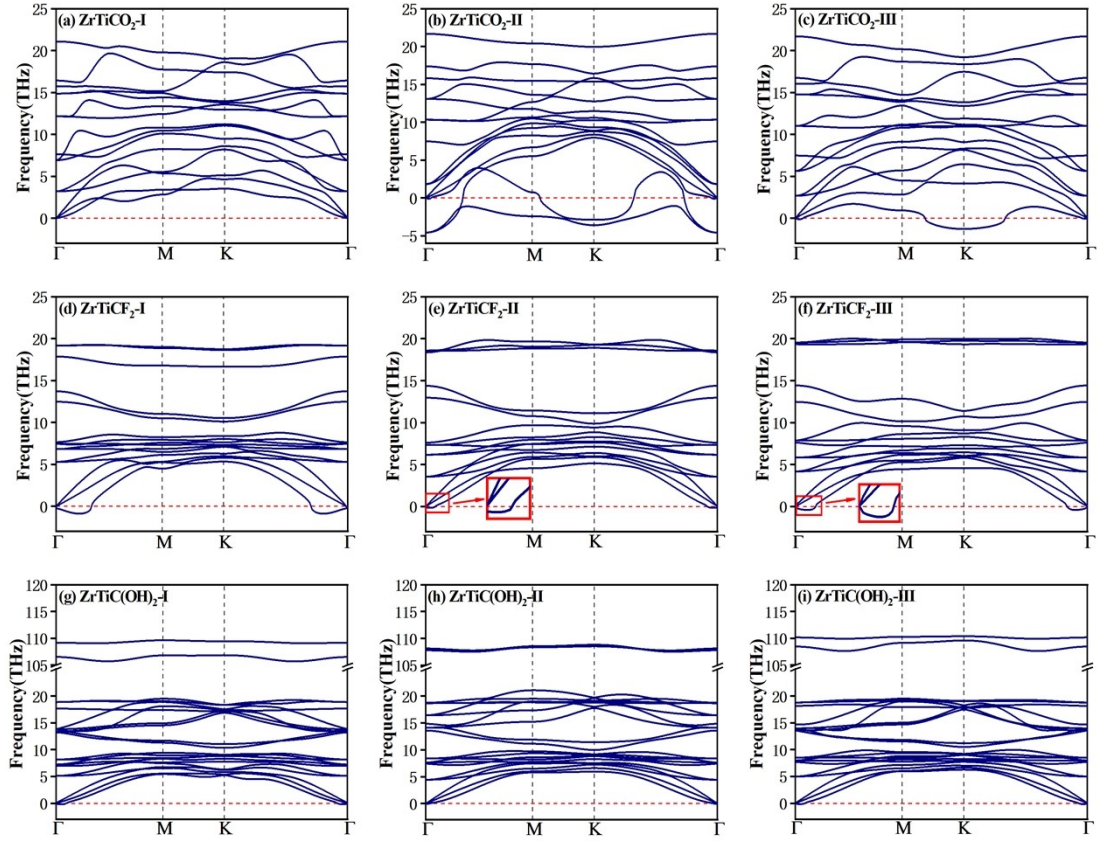

**Fig. S2** Phonon dispersion of surface-functionalized ZrTiC MXenes with ZrTiCT<sub>2</sub>-I, ZrTiCT<sub>2</sub>-II, and ZrTiCT<sub>2</sub>-III structures (T = -O, -F, and -OH). The insets in (e) and (f) display magnified images of the acoustic branches around the  $\Gamma$ -point.

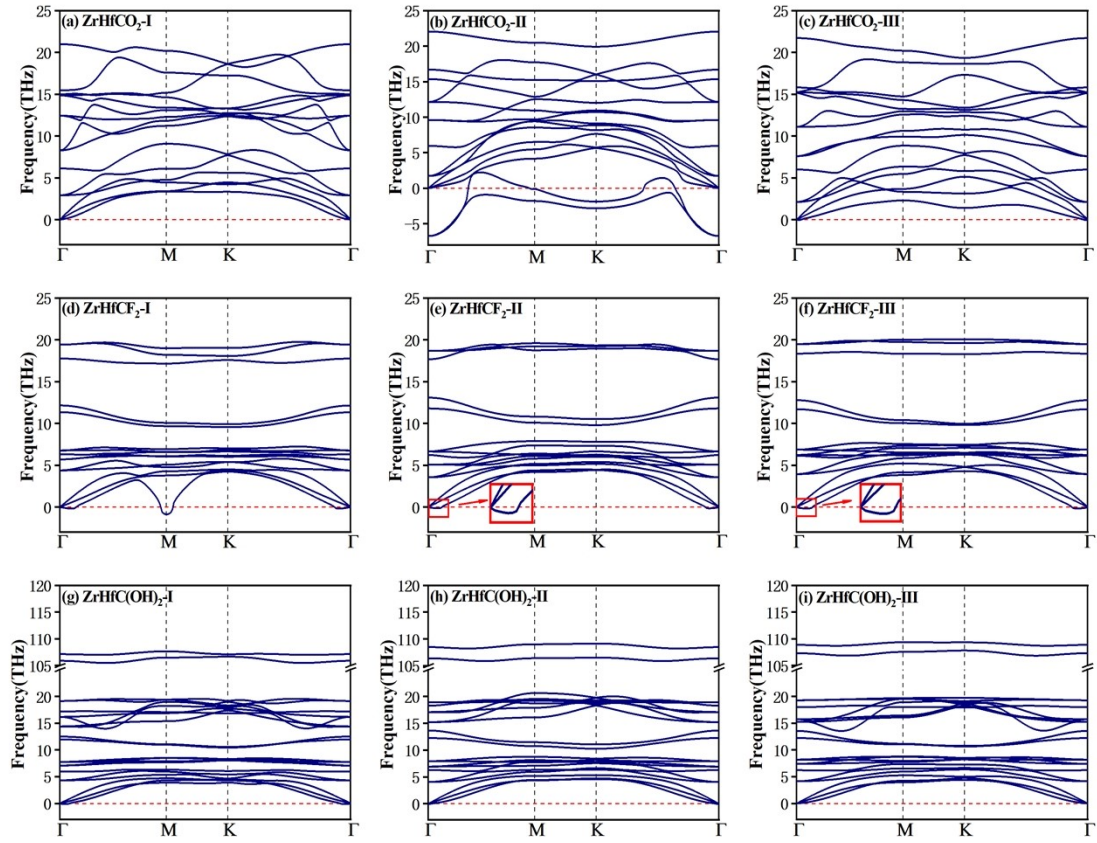

**Fig. S3** Phonon dispersion of surface-functionalized ZrHfC MXenes with ZrHfCT<sub>2</sub>-I, ZrHfCT<sub>2</sub>-II, and ZrHfCT<sub>2</sub>-III structures (T = -O, -F, and -OH). The insets in (e) and (f) display magnified images of the acoustic branches around the  $\Gamma$ -point.

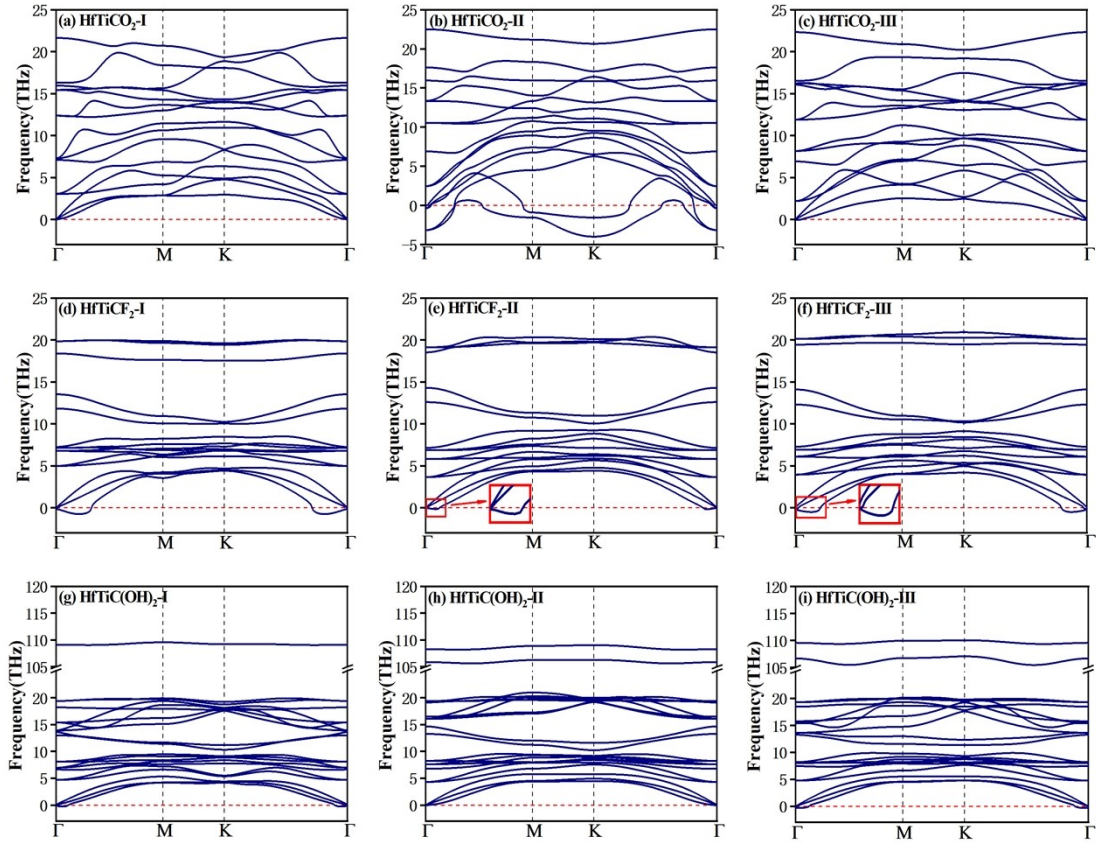

**Fig. S4** Phonon dispersion of surface-functionalized HfTiC MXenes with HfTiCT<sub>2</sub>-I, HfTiCT<sub>2</sub>-II, and HfTiCT<sub>2</sub>-III structures (T = -O, -F, and -OH). The insets in (e) and (f) display magnified images of the acoustic branches around the  $\Gamma$ -point.

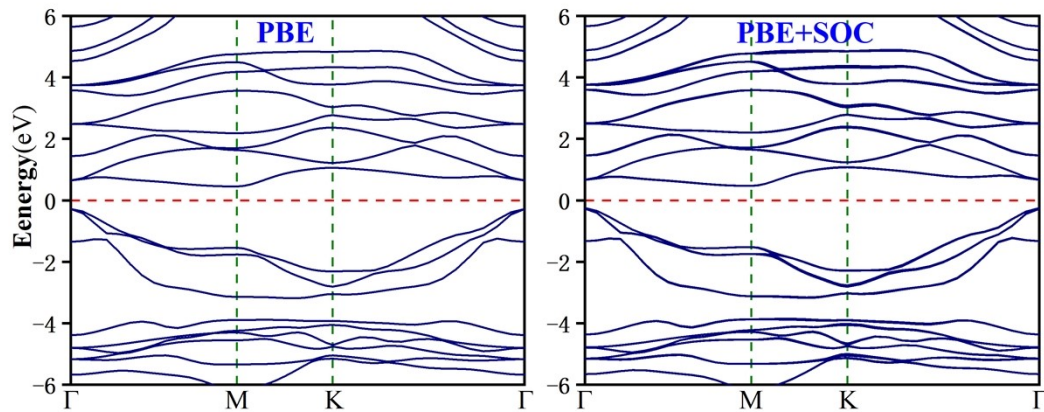

**Fig. S5** Band structures of ZrTiCO<sub>2</sub>-I with PBE and PBE+SOC methods. The red dashed lines mark the Fermi level at 0 eV.

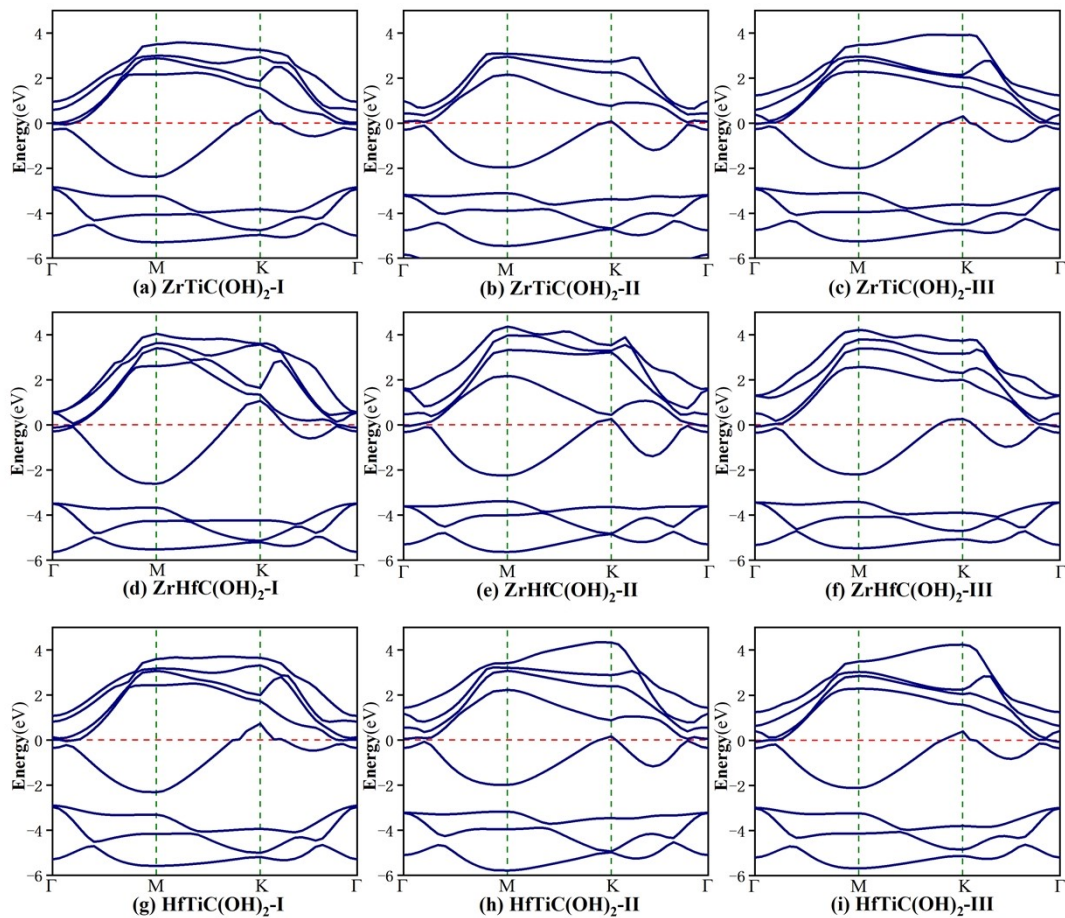

**Fig. S6** Band structures of (a)  $\text{ZrTiC}(\text{OH})_2\text{-I}$ , (b)  $\text{ZrTiC}(\text{OH})_2\text{-II}$ , (c)  $\text{ZrTiC}(\text{OH})_2\text{-III}$ , (d)  $\text{ZrHfC}(\text{OH})_2\text{-I}$ , (e)  $\text{ZrHfC}(\text{OH})_2\text{-II}$ , (f)  $\text{ZrHfC}(\text{OH})_2\text{-III}$ , (g)  $\text{HfTiC}(\text{OH})_2\text{-I}$ , (h)  $\text{HfTiC}(\text{OH})_2\text{-II}$ , and (i)  $\text{HfTiC}(\text{OH})_2\text{-III}$ . The red dashed lines mark the Fermi level at 0 eV.

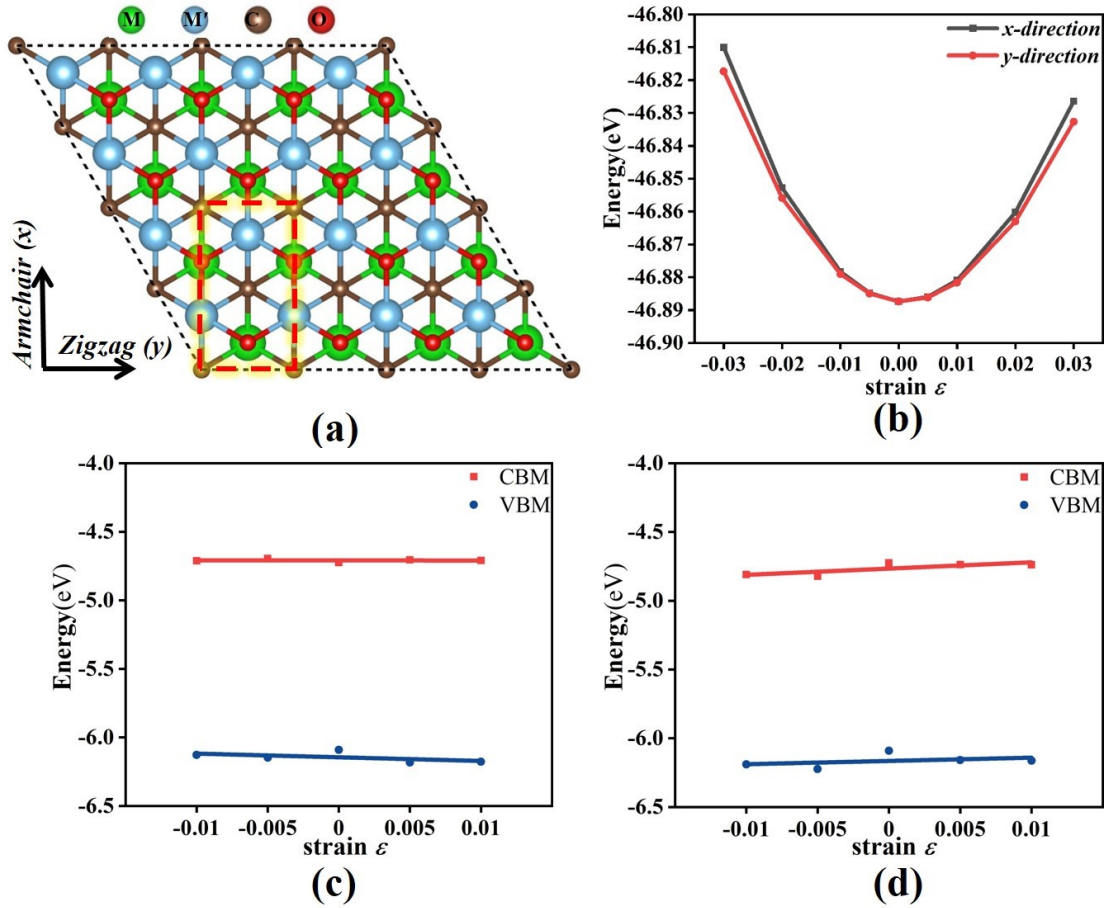

**Fig. S7** (a) ZrTiCO<sub>2</sub>-I Janus monolayer; the black and red dashed lines represent a 4×4 hexagonal supercell and the orthogonal primitive cell, respectively. (b) Relationship between total energy and uniaxial strain along the  $x$  and  $y$  directions. (c,d) Shift of band edge position with respect to the uniaxial strain along the (c)  $x$ - and, (d)  $y$ -direction.

### Details of Carrier Mobility Calculations

As an example, we describe the calculations of the electron carrier mobility along the  $x$  direction of the ZrTiCO<sub>2</sub>-I Janus monolayer. To obtain the elastic modulus  $C$  and deformation potential constant  $E_1$ , we calculated the total energy and band edge positions as a function of the uniaxial strain  $\epsilon$ , as shown in Fig. S6(b,c). The calculated results are listed in Table S4.

To calculate the effective mass, we plotted the relationship between the energy  $E(k)$  and the wave vector  $k$  with 30 high-density  $k$ -points near the CBM, then employed a second-order polynomial function to fit the curve:

$$E(k) = \text{Intercept} + B_1 k + B_2 k^2$$

The second derivative of the fitting function is:

$$\left. \frac{\partial^2 E(k)}{\partial k^2} \right|_{k=M(0.5,0,0)} = 2B_2$$

According to the definition of carrier effective mass, the electron effective mass along the  $x$ -direction can be calculated as:

$$m^* = \hbar^2 / (\partial^2 E(k) / \partial k^2) = \hbar^2 / 2B_2$$

**Table S1** Cohesive energies ( $E_{coh}$ , eV/atom) of functionalized Janus MXenes.

|              | ZrTiCT <sub>2</sub> |      |      | ZrHfCT <sub>2</sub> |      |      | HfTiCT <sub>2</sub> |      |      |
|--------------|---------------------|------|------|---------------------|------|------|---------------------|------|------|
|              | T=O                 | T=F  | T=OH | T=O                 | T=F  | T=OH | T=O                 | T=F  | T=OH |
| Geometry I   | 7.59                | 6.88 | 5.99 | 8.14                | 7.25 | 6.28 | 7.78                | 6.99 | 6.09 |
| Geometry II  | 7.20                | 6.79 | 5.95 | 7.71                | 7.19 | 6.25 | 7.38                | 6.90 | 6.05 |
| Geometry III | 7.42                | 6.82 | 6.00 | 7.96                | 7.26 | 6.29 | 7.60                | 6.94 | 6.08 |



**Table S2** Band gaps ( $E_g$ , eV) of  $MM'CT_2$  with differently functionalized geometries calculated at the HSE06 level. The M label denotes metallic properties of the corresponding  $MM'CT_2$  material.

|                         | ZrTiCT <sub>2</sub> |      |      | ZrHfCT <sub>2</sub> |      |      | HfTiCT <sub>2</sub> |      |      |
|-------------------------|---------------------|------|------|---------------------|------|------|---------------------|------|------|
|                         | T=O                 | T=F  | T=OH | T=O                 | T=F  | T=OH | T=O                 | T=F  | T=OH |
| MM'CT <sub>2</sub> -I   | 1.37                | none | M    | 1.71                | none | M    | 1.43                | none | M    |
| MM'CT <sub>2</sub> -II  | none                | none | M    | none                | none | M    | none                | none | M    |
| MM'CT <sub>2</sub> -III | none                | none | M    | 1.77                | none | M    | 1.94                | none | M    |

**Table S3** Vacuum level, CBM and VBM levels (eV) of ZrTiCO<sub>2</sub>-I, ZrHfCO<sub>2</sub>-I, ZrHfCO<sub>2</sub>-III, HfTiCO<sub>2</sub>-I, and ZrHfCO<sub>2</sub>-III.  $E_{CBM}$  and  $E_{VBM}$  denote band edge positions, whose value are listed relative to the Fermi level, vacuum level and normal hydrogen electrode ( $E_{NHE} = -4.5$  eV), respectively.

|                          | $E_{Vacuum}$ | $E_{Fermi}$ | $E_{CBM}$ |        |       | $E_{VBM}$ |        |      |
|--------------------------|--------------|-------------|-----------|--------|-------|-----------|--------|------|
|                          |              |             | vs.       | vs.    | vs.   | vs.       | vs.    | vs.  |
|                          |              |             | Fermi     | vacuum | NHE   | Fermi     | vacuum | NHE  |
| ZrTiCO <sub>2</sub> -I   | 4.24         | -1.77       | 1.29      | -4.73  | 0.23  | -0.08     | -6.09  | 1.59 |
| ZrHfCO <sub>2</sub> -I   | 3.99         | -1.61       | 1.59      | -4.01  | -0.49 | -0.12     | -5.72  | 1.22 |
| ZrHfCO <sub>2</sub> -III | 4.21         | -2.47       | 1.52      | -5.16  | 0.66  | -0.25     | -6.93  | 2.43 |
| HfTiCO <sub>2</sub> -I   | 3.69         | -2.19       | 1.24      | -4.65  | 0.15  | -0.19     | -6.08  | 1.58 |
| HfTiCO <sub>2</sub> -III | 3.92         | -3.35       | 1.83      | -5.43  | 0.93  | -0.10     | -7.37  | 2.87 |

Table S4 Effective mass  $|m^*|$ , deformation potential constant  $|E_I|$ , in-plane stiffness  $C$ , and carrier-mobility  $\mu$  for electrons and holes along the  $x$  and  $y$  directions.

|                          |                  | $C$ (N/m) | $ E_I $ (eV) | $ m^* $ ( $m_e$ ) | $\mu$ ( $\text{cm}^2 \cdot \text{V}^{-1} \cdot \text{s}^{-1}$ ) |
|--------------------------|------------------|-----------|--------------|-------------------|-----------------------------------------------------------------|
| ZrTiCO <sub>2</sub> -I   | Electron ( $x$ ) | 280       | 0.08         | 16.45             | 2296                                                            |
|                          | Hole ( $x$ )     | 280       | 2.68         | 0.16              | 21621                                                           |
|                          | Electron ( $y$ ) | 253       | 4.56         | 4.21              | 10                                                              |
|                          | Hole ( $y$ )     | 253       | 2.38         | 1.08              | 544                                                             |
| ZrHfCO <sub>2</sub> -I   | Electron ( $x$ ) | 289       | 7            | 1.92              | 23                                                              |
|                          | Hole ( $x$ )     | 289       | 3.84         | 0.18              | 8589                                                            |
|                          | Electron ( $y$ ) | 258       | 3.08         | 2.31              | 72                                                              |
|                          | Hole ( $y$ )     | 258       | 1.18         | 1.15              | 1989                                                            |
| ZrHfCO <sub>2</sub> -III | Electron ( $x$ ) | 267       | 11.34        | 2.76              | 4                                                               |
|                          | Hole ( $x$ )     | 267       | 9.82         | 0.30              | 437                                                             |
|                          | Electron ( $y$ ) | 240       | 2.42         | 2.65              | 83                                                              |
|                          | Hole ( $y$ )     | 240       | 0.52         | 2.16              | 2701                                                            |
| HfTiCO <sub>2</sub> -I   | Electron ( $x$ ) | 267       | 3.58         | 2.99              | 33                                                              |
|                          | Hole ( $x$ )     | 267       | 0.58         | 13.23             | 64                                                              |
|                          | Electron ( $y$ ) | 240       | 8.04         | 3.93              | 3                                                               |
|                          | Hole ( $y$ )     | 240       | 10.22        | 1.16              | 24                                                              |
| HfTiCO <sub>2</sub> -III | Electron ( $x$ ) | 262       | 4.02         | 2.81              | 29                                                              |
|                          | Hole ( $x$ )     | 262       | 6.3          | 0.69              | 197                                                             |
|                          | Electron ( $y$ ) | 234       | 0.16         | 2.57              | 19649                                                           |
|                          | Hole ( $y$ )     | 234       | 1.88         | 1.46              | 441                                                             |
